# Supplementary material for: Effect of Cold Rolling on the Evolution of Shear Bands and Nanoindentation Hardness in Zr41.2Ti13.8Cu12.5Ni10Be22.5 Bulk Metallic Glass
Source: MDPI journal article supplement (doi:10.3390/nano11071670), 2021-06-25
Supplement: s1 [file s1]

*Supplementary information*

**Effect of Cold Rolling on the Evolution of Shear Bands  
and Nanoindentation Hardness in  $\text{Zr}_{41.2}\text{Ti}_{13.8}\text{Cu}_{12.5}\text{Ni}_{10}\text{Be}_{22.5}$   
Bulk Metallic Glass**

Abhilash Gunti <sup>1</sup>, Parijat Pallab Jana <sup>1</sup>, Min-Ha Lee <sup>2</sup>, and Jayanta Das <sup>1,\*</sup>

<sup>1</sup> Department of Metallurgical and Materials Engineering, Indian Institute of Technology Kharagpur, West Bengal 721302, India; abhilash@iitkgp.ac.in (A.G.); parijat.pallab@iitkgp.ac.in (P.P.J.)

<sup>2</sup> KITECH North America, Korea Institute of Industrial Technology, San Jose, CA 95134, USA; mhlee1@kitech.re.kr

\* Correspondence: j.das@metal.iitkgp.ac.in; Tel.: +91-3222-283284; Fax: +91-3222-282280

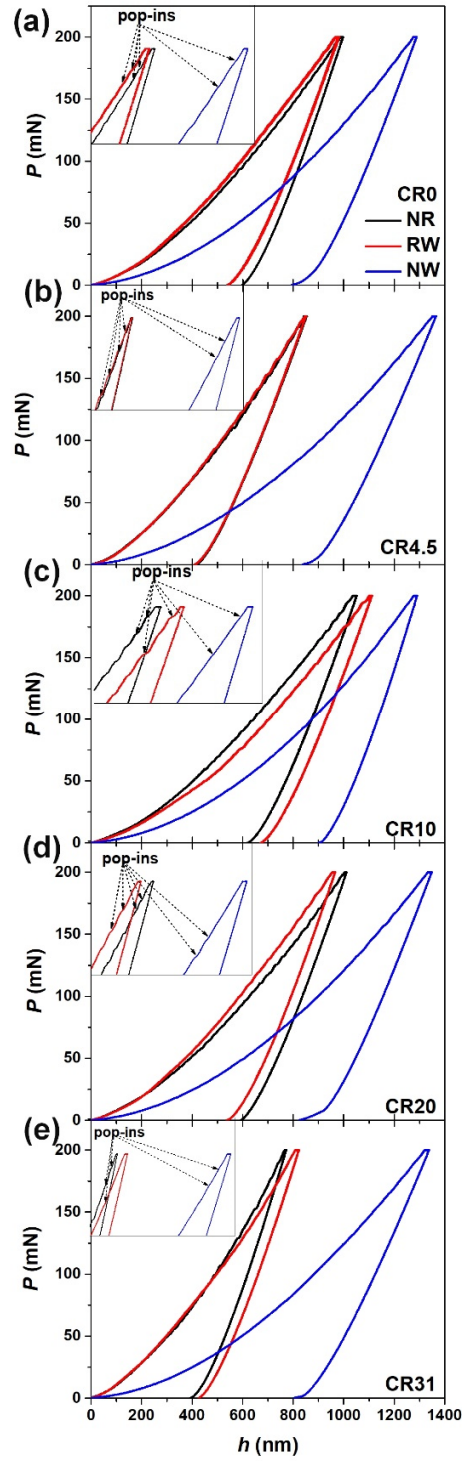

**Figure S1:**  $P$ - $h$  plots at  $P_{\max} = 200$  mN along along NR, RW and NW; (a) CR0, (b) CR4.5, (c) CR10, (d) CR20 and (e) CR31, pop-in events are more pronounced in CR0, which gradually decreases with the increase of cold rolling strain.

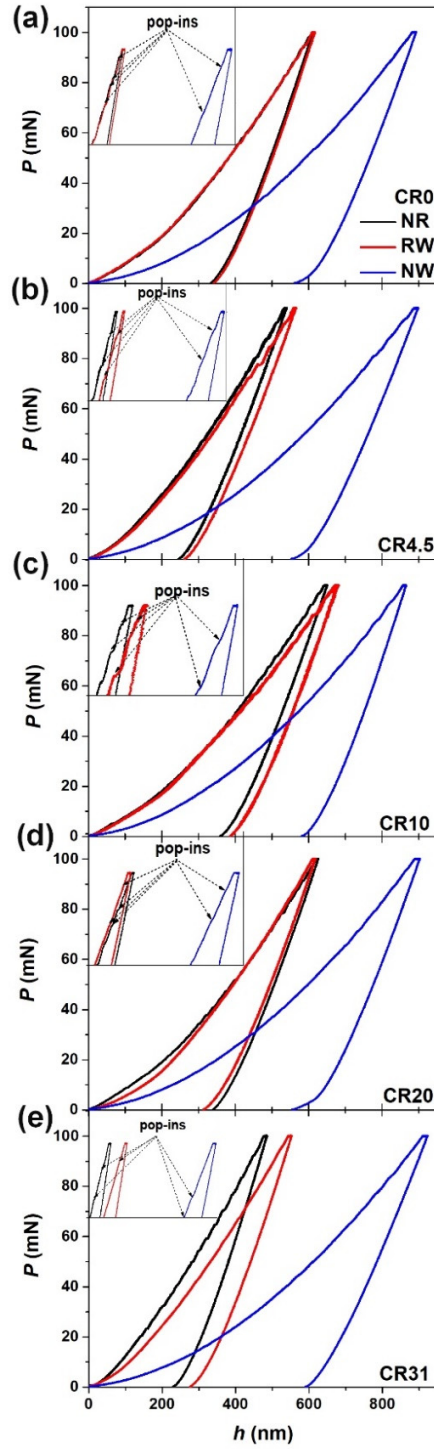

**Figure S2:**  $P$ - $h$  plots at  $P_{\max} = 100$  mN along NR, RW and NW; (a) CR0, (b) CR4.5, (c) CR10, (d) CR20 and (e) CR31, pop-in events are more pronounced in CR0, which gradually decreases with the increase of cold rolling strain.

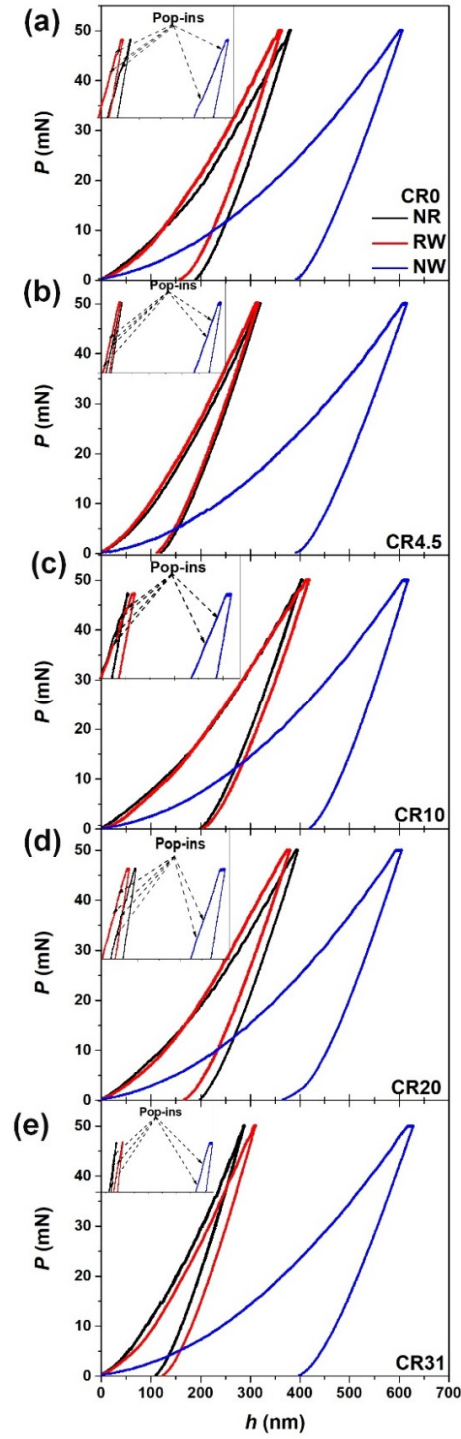

**Figure S3:**  $P$ - $h$  plots at  $P_{\max} = 50$  mN along NR, RW and NW; (a) CR0, (b) CR4.5, (c) CR10, (d) CR20 and (e) CR31, pop-in events are more pronounced in CR0, which gradually decreases with the increase of cold rolling strain.
